# Supplementary material
Source: PubMed Central journal article supplement (PMC10752578)
Supplement: NIHMS1950194-supplement-1.pdf [file NIHMS1950194-supplement-1.pdf]

A

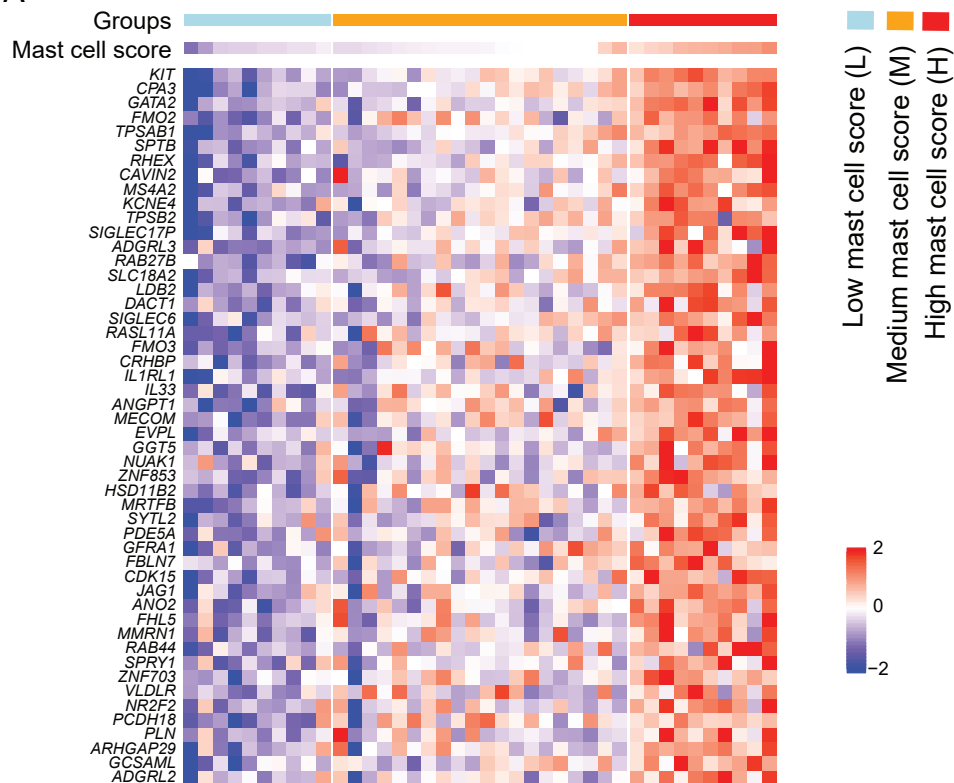

B

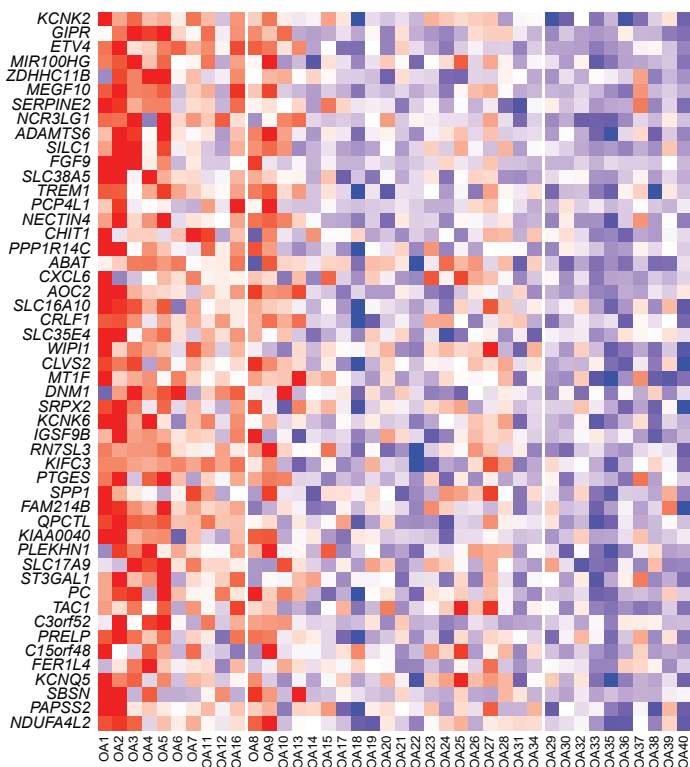

Supplemental Figure 1

A

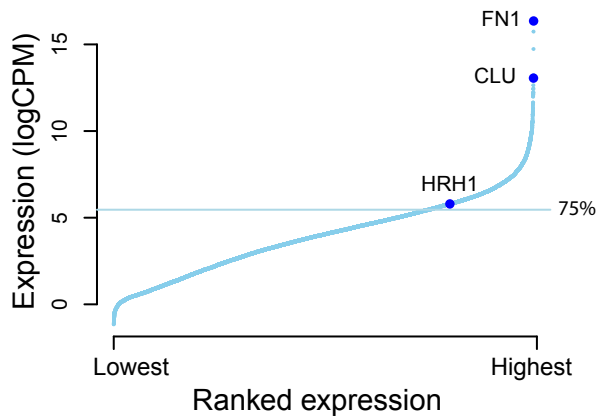

B

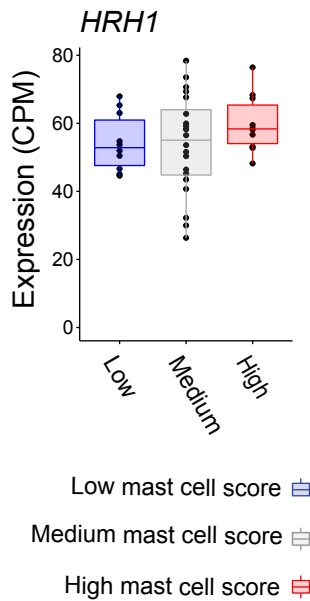

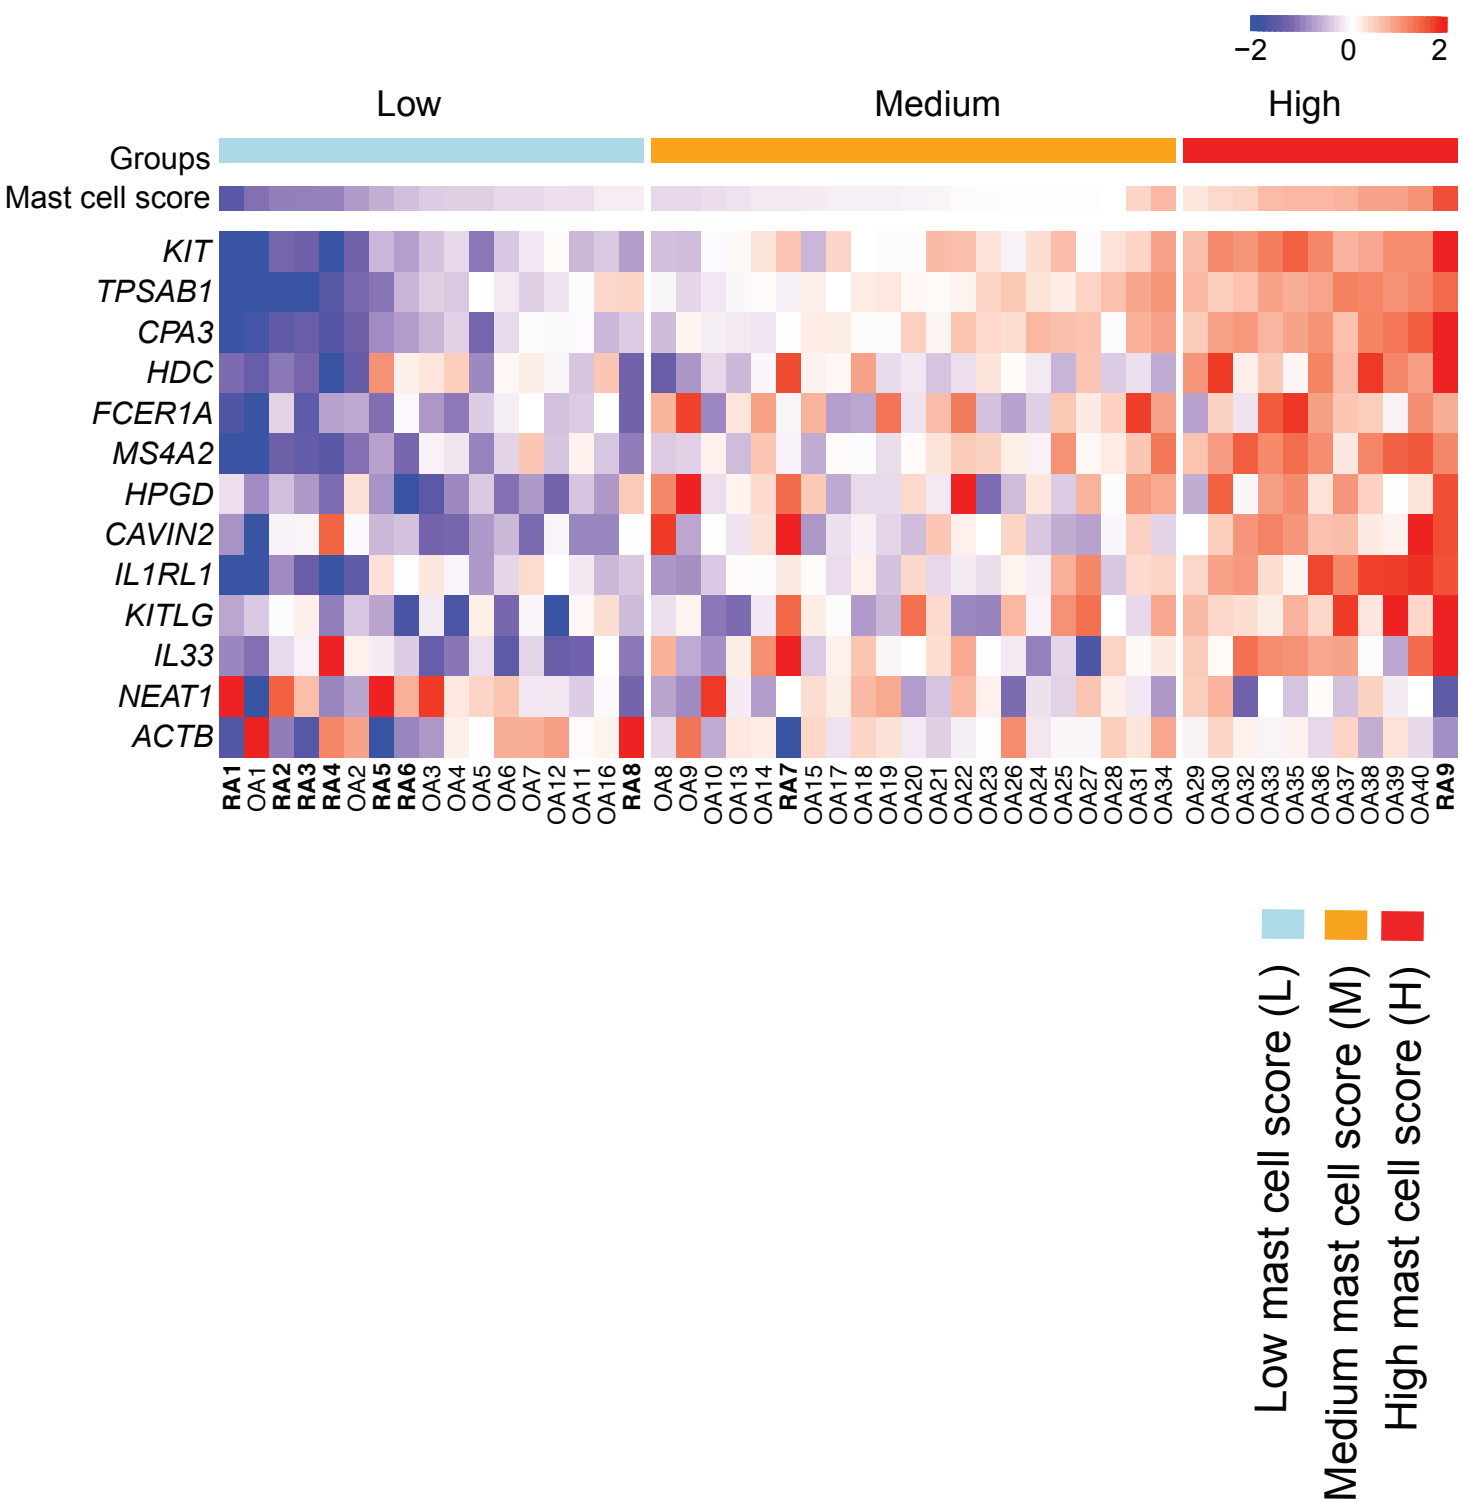

Supplemental Figure 3

|               | AGE  |       |      | GENDER |    | BMI    |            |       | PRIOR INJURY |    | LIMITED TO KNEE |    | PAIN MEDICATION |    |
|---------------|------|-------|------|--------|----|--------|------------|-------|--------------|----|-----------------|----|-----------------|----|
|               | ≤ 50 | 50-69 | ≥ 70 | F      | M  | NORMAL | OVERWEIGHT | OBESE | YES          | NO | YES             | NO | YES             | NO |
| <b>LOW</b>    |      | 3     | 7    | 3      | 7  | 3      | 3          | 4     | 4            | 6  | 1               | 9  | 9               | 1  |
| <b>MEDIUM</b> | 1    | 10    | 9    | 0      | 20 | 1      | 9          | 10    | 17           | 3  | 4               | 16 | 20              | 0  |
| <b>HIGH</b>   | 1    | 4     | 5    | 2      | 8  | 1      | 1          | 8     | 3            | 7  | 1               | 9  | 10              | 0  |
